# Supplementary material for: One-dimensional nanotube of a metal–organic framework boosts charge separation and photocatalytic hydrogen evolution from water: synthesis and underlying understanding
Source: Royal Society of Chemistry journal article supplement (doi:10.1039/d4ey00007b), 2024-01-01
Supplement: d4ey00007b1.pdf [file d4ey00007b1.pdf]

## Supporting Information

### **One-dimensional nanotube of metal-organic framework boosts charge separation and photocatalytic hydrogen evolution from water: synthesis and underlying understanding**

Lifang Liu<sup>†a,b</sup>, Yejun Xiao<sup>†c</sup>, Xiangyang Guo<sup>a</sup>, Wenjun Fan<sup>a</sup>, Nengcong Yang<sup>a,b</sup>, Chunmei Jia<sup>a</sup>, Shengye Jin<sup>c</sup>, and Fuxiang Zhang<sup>\*a</sup>

<sup>a</sup> State Key Laboratory of Catalysis, Dalian Institute of Chemical Physics, Chinese Academy of Sciences, Dalian National Laboratory for Clean Energy, Dalian 116023, China

<sup>b</sup> Center of Materials Science and Optoelectronics Engineering, University of Chinese Academy of Sciences, Beijing 100049, China

<sup>c</sup> State Key Laboratory of Molecular Reaction Dynamics and Dynamics Research Center for Energy and Environmental Materials, Dalian Institute of Chemical Physics, Chinese Academy of Sciences, Dalian 116023, China

<sup>†</sup>These authors contributed equally: Lifang Liu, Yejun Xiao

E-mail: fxzhang@dicp.ac.cn

## Methods

### Materials

1,3,6,8-tetrakis (p-benzoic acid) pyrene ( $H_4TBAPy$ ) was purchased from Jilin Chinese Academy of Sciences-Yanshen technology Co. Ltd,  $MnCl_2 \cdot 4H_2O$ , N, N-dimethylformamide (DMF), Dioxane, and Methanol (MeOH) were bought by Sinopharm Chemical Reagent Shenyang Co.Ltd. All chemicals were used without further purification.

### Synthesis of Mn-TBAPy-NT and Mn-TBAPy-SC

$MnCl_2 \cdot 4H_2O$  (2.3 mg) and  $H_4TBAPy$  (5 mg) were dissolved in DMF solvent (4 mL). The  $MnCl_2 \cdot 4H_2O$  solvent was dropped into  $H_4TBAPy$  solution under stirring 30 min and then transferred into a 25 mL Teflon-lined stainless-steel autoclave. The autoclave was heated at 120 °C for 6 h and then cooled to room temperature. Yellow powder of Mn-TBAPy-NT nanotubes were obtained by washing with DMF, mixed solution of MeOH and  $H_2O$  three times and freeze drying.

According to previous synthesis methods of Mn-TBAPy-SC<sup>1</sup>,  $MnCl_2 \cdot 4H_2O$  (29.7 mg) and  $H_4TBAPy$  (66.6 mg) were dispersed in a mixed solution of DMF,  $H_2O$ , and Dioxane (4 mL, 2:1:1, v/v/v), and sealed in a 25 mL Teflon-lined stainless-steel autoclave. The autoclave was heated at 120 °C for 72 h, and then cooled to room temperature at a rate of 5 °C h<sup>-1</sup>. Yellow powder of Mn-TBAPy-SC single crystal were obtained by washing with DMF and  $CH_3CN$  four times, and dried in a vacuum oven overnight.

### Preparation of Pt/Mn-TBAPy-NT and Pt/Mn-TBAPy-SC

$H_2PtCl_6$  aqueous solution (60  $\mu$ L, 1 mg mL<sup>-1</sup>) was added into 20 mg Mn-TBAPy-NT or Mn-TBAPy-SC powder, and then dried at 80 °C under stirring. The platinum-modified Mn-TBAPy-NT or Mn-TBAPy-SC (Pt/Mn-TBAPy-NT and Pt/Mn-TBAPy-SC, 0.3 wt% Pt) were reduced with 5%  $H_2/Ar$  at 473 K for 2 h.

### Characterization

**XRD:** XRD measurements were tested by SmartLab X-ray diffractometer (Cu K $\alpha$  radiation,  $\lambda = 1.5418 \text{ \AA}$ ). A scan rate of 5 ° min<sup>-1</sup> was applied in the range of 5-40°.

**UV-vis:** UV-vis diffuse reflectance spectra (DRS) were recorded on a UV-vis spectrophotometer (SHIMADZU UV-2600) at room temperature equipped with an integrating sphere using standard  $BaSO_4$  white powder as reference for the baseline correction.

**BET:** The Brunauer-Emmett-Teller (BET) surface area experiment was performed on Micromeritics ASAP 2000 adsorption analyzer at 77 K.

**FT-IR:** Fourier transform infrared (FT-IR) spectra were measured by thermofisher scientific-Nicolet iS50 system from KBr pellets.

**XPS:** The binding energies were measured by X-ray photoelectron spectroscopy (XPS) and using Thermo Fisher ESCALAB250xi with a monochromatic Al Ka X-ray source.

**SEM:** Scanning electron microscope (SEM) images were measured by Quanta 200F and JSM-7900F.

**TEM:** Transmission electron microscope (TEM) images were measured by JEM-2100 microscope.

**EPR:** The synthesized Mn-TBAPy-SC and Mn-TBAPy-NT powder samples was transferred into the EPR reactor and the EPR spectra were obtained by using Bruker A200 at 110K.

**Raman spectra :** Raman spectra were collected using 785 nm diode-pumped solid-state laser (Changchun New Industries Optoelectronics Technology Co., Ltd.) and a commercial Raman spectrometer (Invia, Renishaw plc.).

**Time-resolved fluorescence decay kinetics:** Samples are measured by a home-built PL-scanned imaging microscope coupled with time-correlated single photon counting (TCSPC) module. Excitation of the sample is achieved with a pulsed 375 nm laser (PDL 800-B, PicoQuANT).

### **Femtosecond transient absorption spectroscopy (TA) measurement**

The femtosecond transient absorption (fs-TA) setup was used to record the TA data. which is based on a regenerative amplified Ti:sapphire laser system from Coherent (800 nm, 35 fs, 6 mJ/pulse, and 1 kHz repetition rate), nonlinear frequency mixing techniques and the Femto-TA100 spectrometer (Time-Tech Spectra). Briefly, the 800 nm output pulse from the regenerative amplifier was split in two parts with a 50% beam splitter. The transmitted part was used to pump a TOPAS Optical Parametric Amplifier (OPA) which generates a wavelength-tunable laser pulse from 250 nm to 2.5  $\mu$ m as pump beam. The reflected 800 nm beam was split again into two parts. One part with less than 10% was attenuated with a neutral density filter and focused into a 2 mm thick sapphire window to generate a white light continuum (WLC) from 420 nm to 800 nm used for probe beam. The probe beam was focused with an Al parabolic reflector onto the sample. After the sample, the probe beam was collimated and then focused into a fiber-coupled spectrometer with CMOS sensors and detected at a frequency of 1 kHz. The intensity of the pump pulse used in the experiment was controlled by a variable neutral-density filter wheel. The delay between the pump and probe pulses was controlled by a motorized delay stage. The pump pulses were chopped by a synchronized chopper at 500 Hz

and the absorbance change was calculated with two adjacent probe pulses (pump-blocked and pump-unblocked). All experiments were performed at room temperature.

### **Nanosecond transient absorption measurement**

Nanosecond TA experiments were measured with the EOS spectrometer (Nano-TA100, Time-Tech Spectra). The pump beam is generated in the same way as the femtosecond TA experiment described above. A different white light continuum (380–1700 nm, 0.5 ns pulse width, 20 kHz repetition rate) was used, which was generated by focusing a Nd:YAG laser into a photonic crystal fiber. The delay time between the pump and probe beam was controlled by a digital delay generator 4 (CNT-90, Pendulum Instruments).

### **XAFS data analysis**

The X-ray absorption fine structure spectra at the Mn k-edge was collected at the 1W1B beamline of Beijing Synchrotron Radiation Facility (BSRF). The data were collected in fluorescence mode using a Lytle detector and the corresponding reference samples were collected in transmission mode.

The acquired EXAFS data were processed according to the standard procedures using the ATHENA module of Demeter software packages. The EXAFS spectra were obtained by subtracting the post-edge background from the overall absorption and then normalized by the edge-jump step. Subsequently, the  $\chi(k)$  data of the EXAFS spectra were Fourier transformed to real (R)<sup>4</sup> space using a Hanning window ( $dk=1.0 \text{ \AA}^{-1}$ ) to separate the EXAFS contributions from different coordination shells. To obtain the quantitative structural parameters around central atoms, least-squares curve parameter fitting was performed using the ARTEMIS module of Demeter software packages. The following EXAFS equation was used:

$$\chi(k) = \sum (N_j S_0^2 F_j(k) / k R_j^2) \cdot \exp[-2k^2 \sigma_j^2] \cdot \exp[-2R_j / \lambda(k)] \cdot \sin[2kR_j + \phi_j(k)].$$

The theoretical scattering amplitudes, phase shifts, and the photoelectron mean free path of all paths were calculated.  $S_0^2$  is the amplitude reduction factor,  $F_j(k)$  is the effective curved-wave backscattering amplitude,  $N_j$  is the number of neighbors in the  $j$ th atomic shell,  $R_j$  is the distance between the X-ray absorbing central atom and the atoms in the  $j$ th atomic shell (backscattered),  $\lambda$  is the mean free path in  $\text{\AA}$ ,  $\phi_j(k)$  is the phase shift (including the phase shift for each shell and the total central atom phase shift),  $\sigma_j$  is the Debye-Waller parameter of the  $j$ th atomic shell (variation of distances around the average  $R_j$ ). The functions  $F_j(k)$ ,  $\lambda$  and  $\phi_j(k)$  were calculated with the ab initio code FEFF9. The additional details for EXAFS simulations are given below. All fits were performed in the R space with k-weight of 2, while phase correction was also applied in the first coordination shell to make R value close to the physical interatomic distance between the absorber and shell scattered. The coordination numbers of model samples were

fixed as the nominal values. The obtained  $S_0^2$  was fixed in the subsequent fitting, while the internal atomic distances  $R$ , Debye-Waller factor  $\sigma^2$ , and the edge-energy shift  $\Delta$  were allowed to run freely.

### **Preparation of work electrode and photoelectrode**

The synthesized catalyst (5 mg) was dispersed into 0.05 % Nafion MeOH solution (0.1 mL) under ultrasonically treating for 30 min, and then the 10  $\mu$ L suspension was dropped onto the surface of the cleaned FTO substrate.

### **Photocatalytic Reactions for Hydrogen Evolution**

Photocatalyst (20 mg) was added into a Pyrex top-irradiation type reaction vessel which connected to an evacuation system containing a mixture of 15 mM ascorbic acid (hole sacrificial agent), deionized water (10 mL), and MeOH (90 mL) for Pt/Mn-TBAPy-NT and Pt/Mn-TBAPy-SC. After that, the reaction solution was degassed completely by a vacuum pump for 15 min under stirring. Finally, the sample was irradiated by a 300 W xenon lamp equipped with a 420 nm optical filter, and the cooling water was used to keep the reaction suspension at 15 °C by circular cooling water device. The gas products were analyzed by gas chromatography (Shimadzu, GC-2014, TCD, Ar carrier). It should be pointed out that during the reaction conditions the Mn-TBAPy-SC sample will be continuously exfoliated and transferred into nanotubes, so its photocatalytic activity evaluation was carried out for 15 mins to reduce the influence of formed nanotubes on the activity as possible as we can.

### **Measurement of apparent quantum efficiency (AQE)**

Photocatalyst Pt/Mn-TBAPy-NT (20 mg) was added into a Pyrex top-irradiation type reaction vessel containing a mixture of 15 mM ascorbic acid (hole sacrificial agent), deionized water (10 mL), and MeOH (90 mL), which connected to an evacuation system. The light source is 300 W Xe lamp with a 420 nm, 440 nm, 460 nm, 480 nm, 520 nm band-pass filter. The number of incident photons reaching the solution was measured by using a calibrated Si photodiode (LS-100, EKO Instruments Co., LTD.). The AQE ( $\phi$ ) was calculated as following equation<sup>2</sup>:

$$AQE = \frac{AR}{I} \times 100 \quad (1)$$

Where,  $A$  represents a coefficient (2 for  $H_2$  evolution),  $R$  represents the evolution rate of  $H_2$ ,  $I$  represents the number of photons reaching the reaction solution. The total numbers of incident photons at the wavelength of 420 nm, 440 nm, 460 nm, 480 nm, 520 nm were measured to be  $1.50 \times 10^{20}$  photons  $h^{-1}$ ,  $2.09 \times 10^{20}$  photons  $h^{-1}$ ,  $2.78 \times 10^{20}$  photons  $h^{-1}$ ,  $3.07 \times 10^{20}$  photons  $h^{-1}$ ,  $2.84 \times 10^{20}$  photons  $h^{-1}$ , respectively. The  $H_2$  evolution rates under the wavelengths of 420 nm,

440 nm, 460 nm, 480 nm, 520 nm were tested to be  $14.59 \mu\text{mol h}^{-1}$ ,  $20.93 \mu\text{mol h}^{-1}$ ,  $25.39 \mu\text{mol h}^{-1}$ ,  $25.66 \mu\text{mol h}^{-1}$ , and  $1.36 \mu\text{mol h}^{-1}$  respectively.

## Supplementary Figures

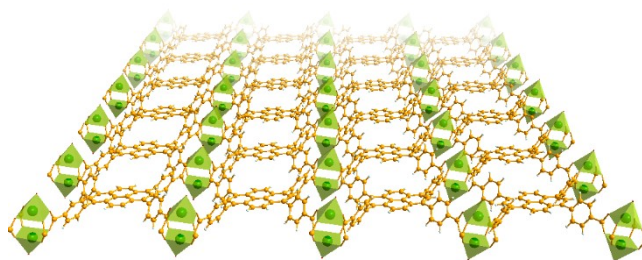

**Fig. S1** 2 D layer structure of Mn-TBAPy.

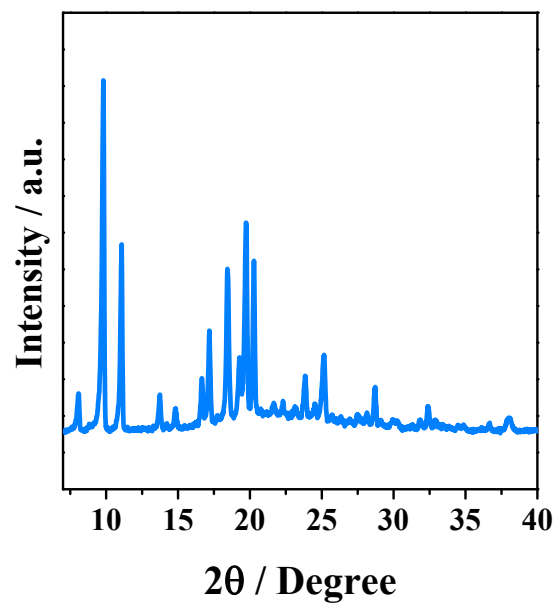

**Fig. S2** XRD patterns of Mn-TBAPy-SC.



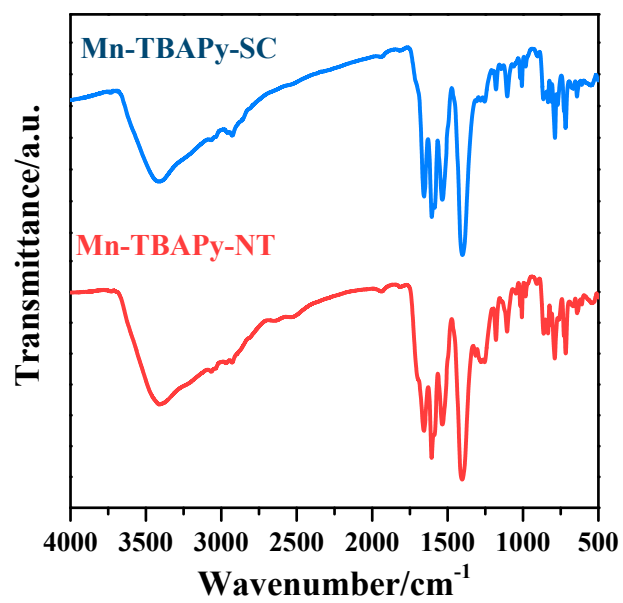

**Fig. S3** FT-IR spectra of Mn-TBAPy-SC and Mn-TBAPy-NT nanotubes.

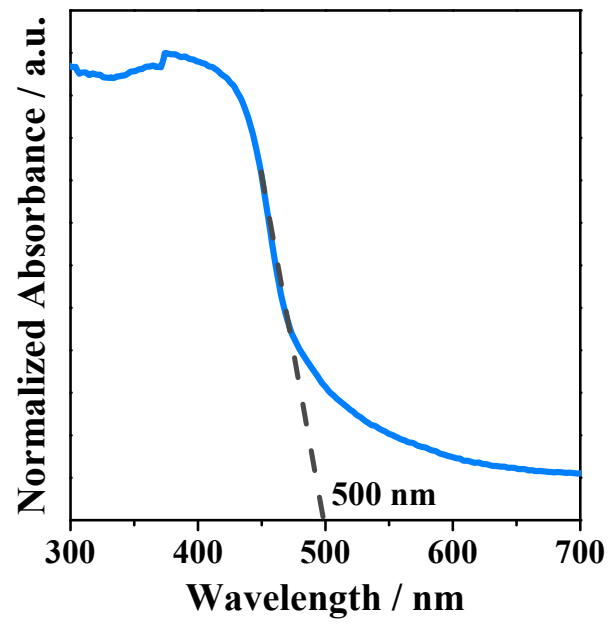

**Fig. S4** UV-vis diffuse reflectance spectrum of Mn-TBAPy-SC.

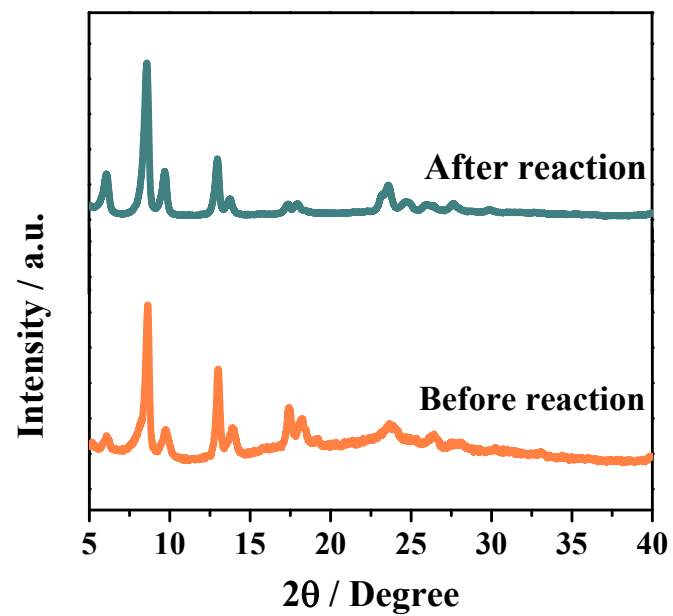

**Fig. S5** XRD patterns of Pt/Mn-TBAPy-NT nanotubes before and after 12 h H<sub>2</sub> evolution reaction.

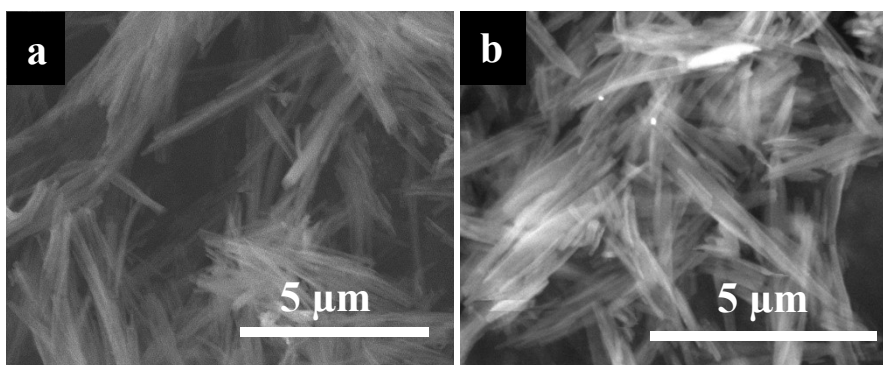

**Fig. S6** SEM images of Pt/Mn-TBAPy-NT nanotubes before a) and after b) 12 h H<sub>2</sub> evolution reaction.

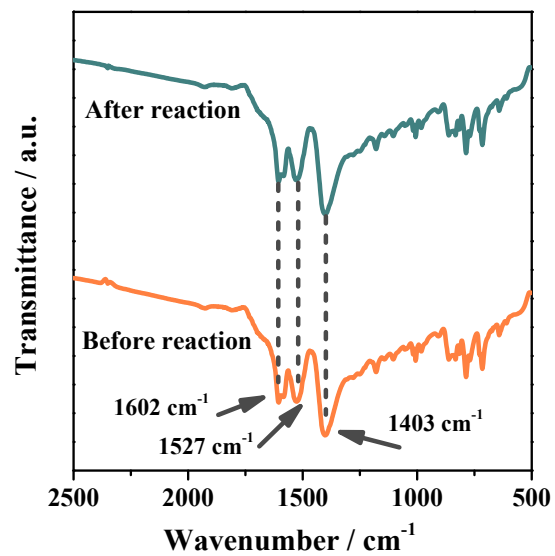

**Fig. S7** FT-IR spectra of Pt/Mn-TBAPy-NT nanotubes before and after 12 h  $\text{H}_2$  evolution reaction.

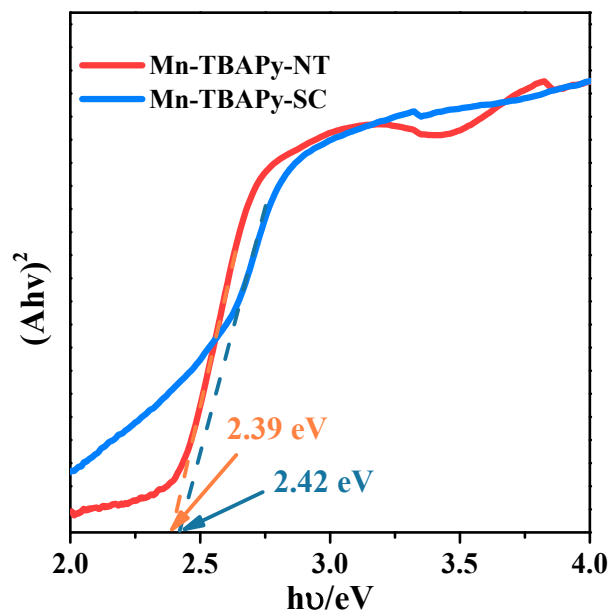

**Fig. S8** Tauc plots of Mn-TBAPy-NT nanotubes and Mn-TBAPy-SC single crystal samples.

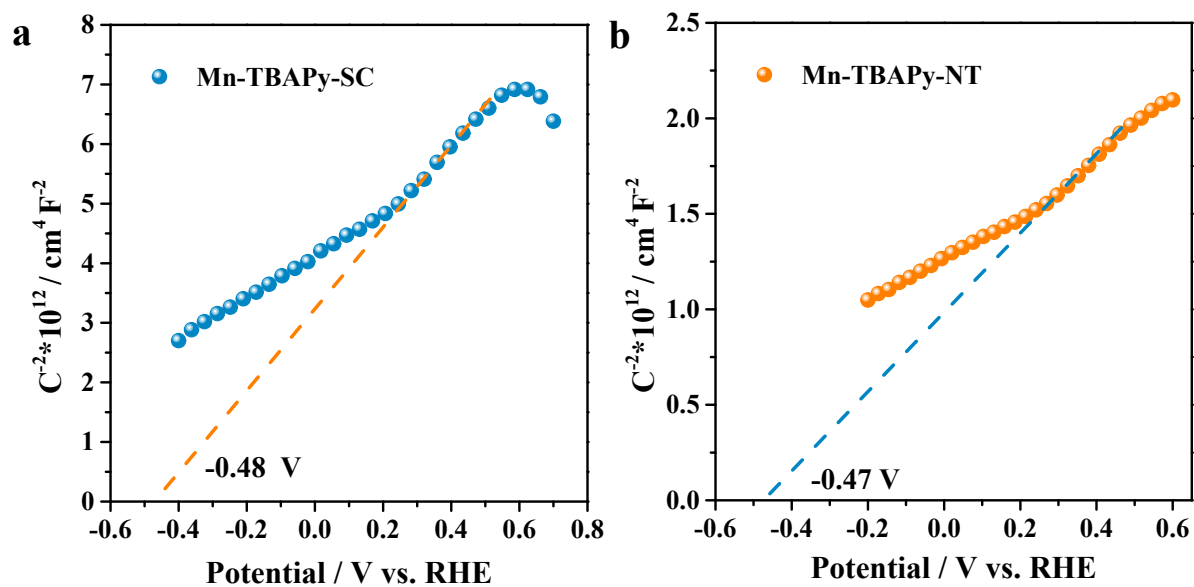

**Fig. S9** Mott-Schottky plots of a) Mn-TBAPy-SC single crystal and b) Mn-TBAPy-NT nanotubes. The samples were dropped on the FTO electrode and measurement frequency is 1 kHz.

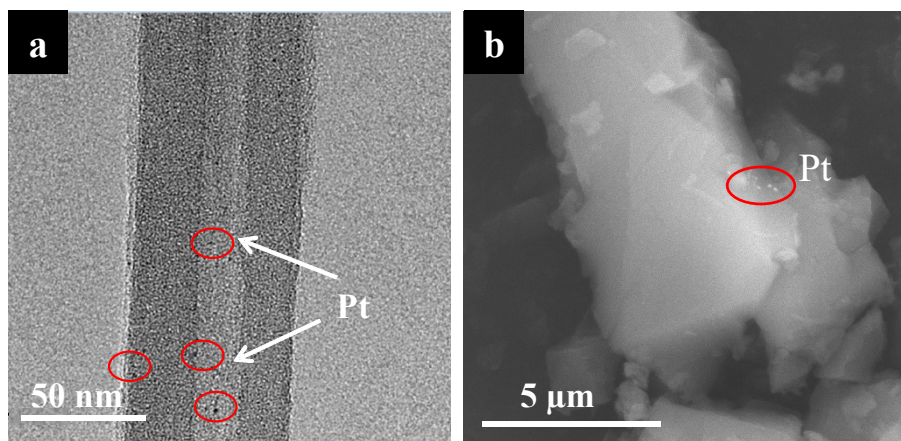

**Fig. S10** a) TEM image of Pt/Mn-TBAPy-NT and b) SEM image of Pt/Mn-TBAPy-SC.



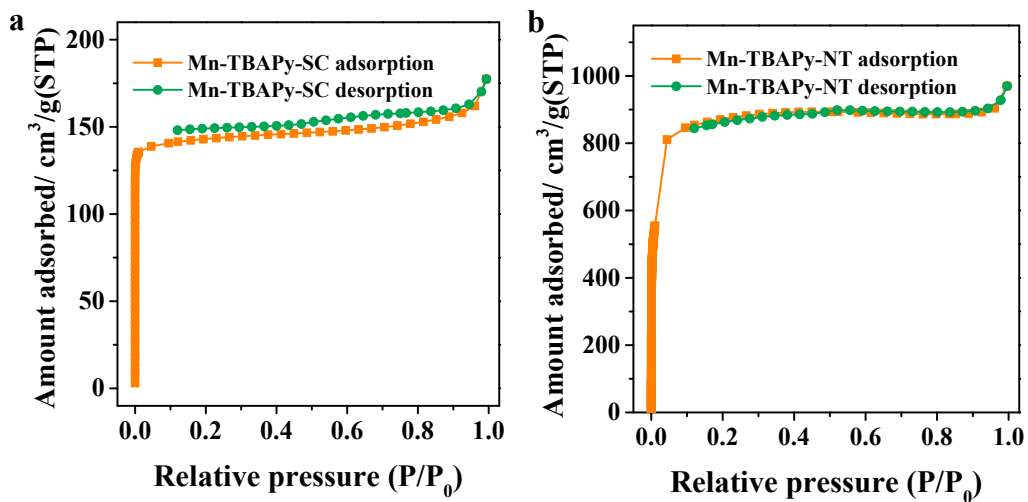

**Fig. S11** N<sub>2</sub>-adsorption/desorption isotherms (77 K) of a) Mn-TBAPy-SC and b) Mn-TBAPy-NT. The BET surface areas of Mn-TBAPy-SC and Mn-TBAPy-NT are 416 m<sup>2</sup> g<sup>-1</sup> and 3243 m<sup>2</sup> g<sup>-1</sup>, respectively.

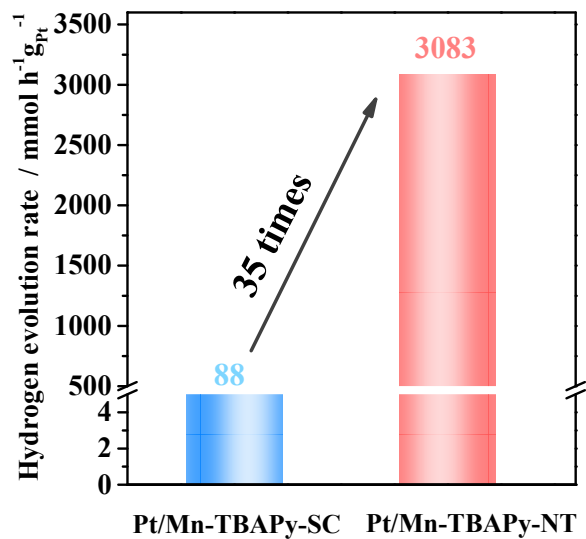

**Fig. S12** Photocatalytic H<sub>2</sub> evolution rates of Mn-TBAPy-NT and Mn-TBAPy-SC after normalized to Pt content.

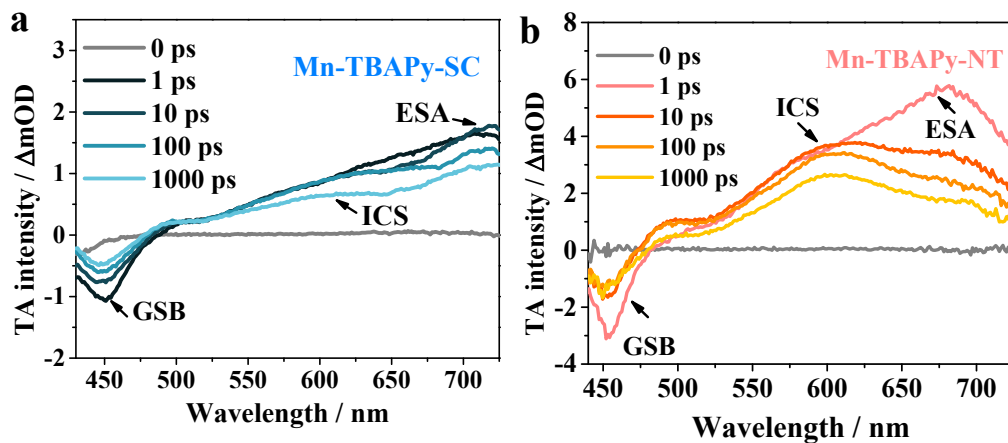

**Fig. S13** Femtosecond transient absorption (fs-TA) spectra of a) Mn-TBAPy-SC and b) Mn-TBAPy-NT.

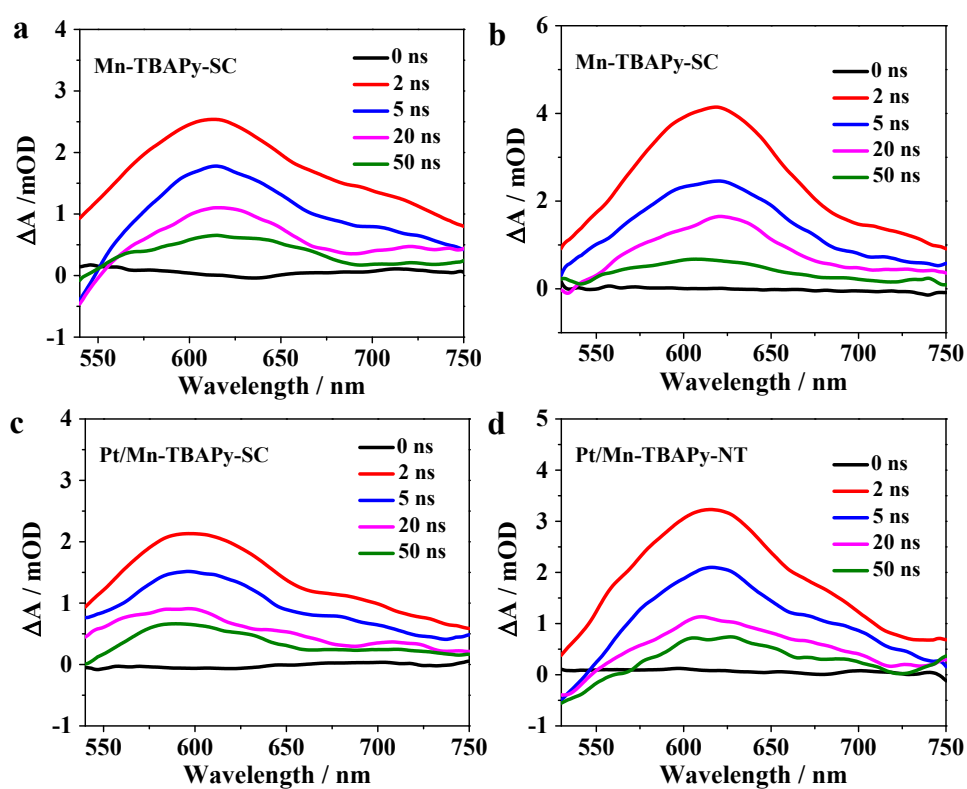

**Fig. S14** Nanosecond transient absorption (ns-TA) spectra of a) Mn-TBAPy-NT, b) Mn-TBAPy-SC, c) Pt/Mn-TBAPy-NT, and d) Pt/Mn-TBAPy-SC at indicated delay times under excitation at 400 nm.

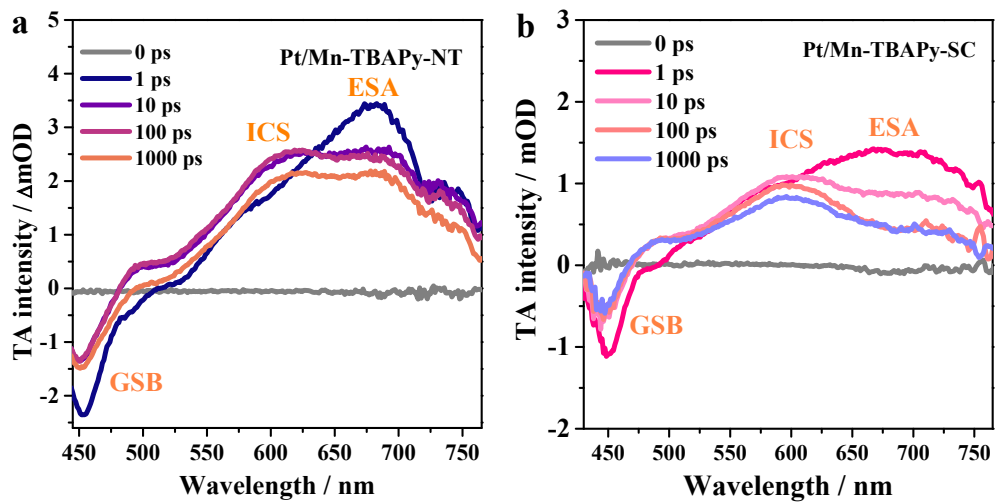

**Fig. S15** Femtosecond transient absorption (fs-TA) spectra of a) Pt/Mn-TBAPy-NT and b) Pt/Mn-TBAPy-SC at indicated delay times under excitation at 400 nm.

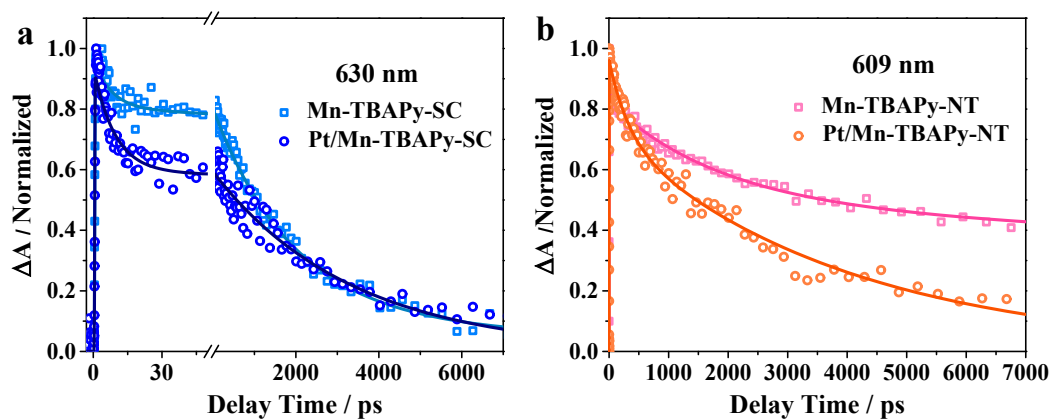

**Fig. S16** Comparison of normalized femtosecond transient absorption (fs-TA) kinetics probed at indicated wavelengths 400 nm of a) Mn-TBAPy-SC and Pt/Mn-TBAPy-SC, b) Mn-TBAPy-NT and Pt/Mn-TBAPy-NT.

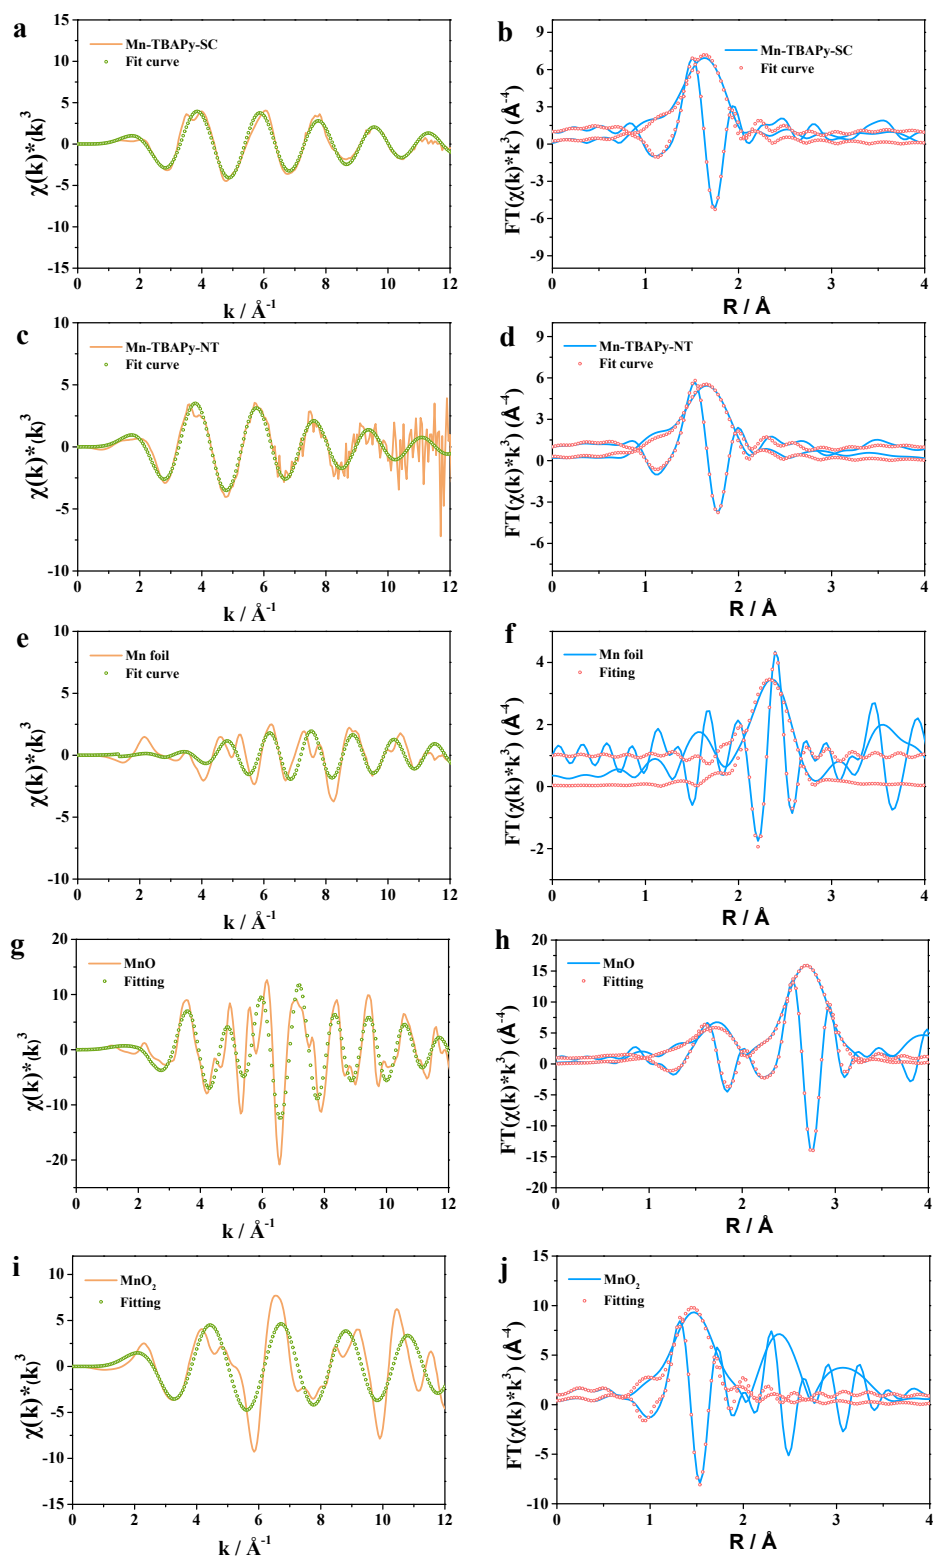

**Fig. S17** Mn K-edge, Mn R space EXAFS, and the curve fitting for Mn-TBAPy-SC, Mn-TBAPy-NT, Mn-foil, MnO, and MnO<sub>2</sub> reference samples.

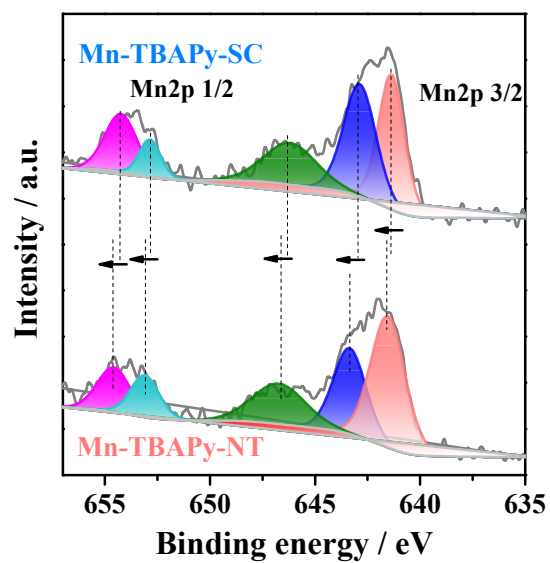

**Fig. S18** X-ray photoelectron spectra (XPS) of Mn-TBAPy-SC and Mn-TBAPy-NT.



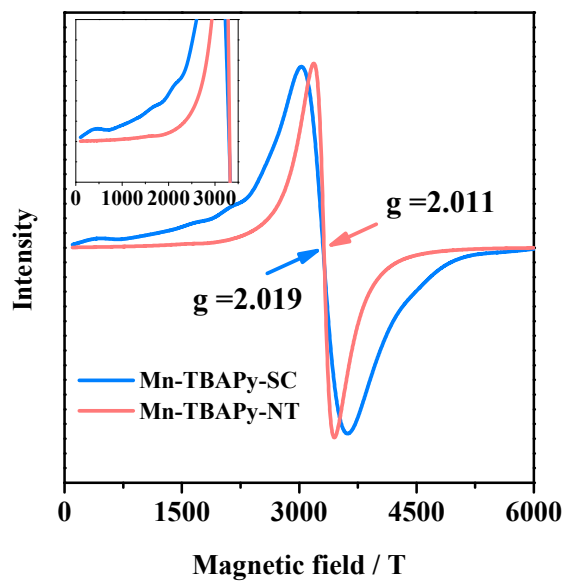

**Fig. S19** Comparison of the EPR spectra of Mn-TBAPy-SC and Mn-TBAPy-NT measured at 77 K. The hyperfine structure for Mn ion disappears in Mn-TBAPy-NT, and the g value changes from 2.011 to 2.019 on both samples, indicating the change of local chemical environment of Mn ion.

## Supplementary Tables

**Table S1** Comparison of photocatalytic water splitting activities and AQEs value for typical MOFs photocatalysts.

| Photocatalysts                                             | Band gap [eV] | H <sub>2</sub> evolution                | AQE %          | Dimension | Light source                             | References                                  |
|------------------------------------------------------------|---------------|-----------------------------------------|----------------|-----------|------------------------------------------|---------------------------------------------|
| Pt/Mn-TBAPy-NT                                             | 2.42          | 203.5 $\mu\text{mol}\cdot\text{h}^{-1}$ | 11.7<br>420 nm | 1D        | 300 W Xe lamp<br>$\lambda\geq 420$ nm    | This work                                   |
| Pt/20%-MIL-125-(SCH <sub>3</sub> ) <sub>2</sub>            | 1.52          | 58.4 $\mu\text{mol}\cdot\text{h}^{-1}$  | 8.9<br>420 nm  | -         | 300 W Xe lamp<br>$\lambda\geq 420$ nm    | Angew. Chem. Int. Ed. 2018, 57, 9864-9869.  |
| Pt/MIL(Ti)-80%                                             | 2.6           | 53 $\mu\text{mol}\cdot\text{h}^{-1}$    | 4.0<br>420 nm  | 2D        | 300 W Xe lamp<br>$\lambda\geq 420$ nm    | Appl. Catal. B 2023, 338, 123094            |
| Pt/Mn-TBAPy-NS                                             | 2.42          | 1.50 $\mu\text{mol}\cdot\text{h}^{-1}$  | -              | 2D        | 300 W Xe lamp                            | Sci. China. Chem. 2020, 63, 1765–1760       |
| Ni <sub>i</sub> -S/MOF                                     | 2.8           | 6.8 $\mu\text{mol}\cdot\text{h}^{-1}$   | -              | 3D        | 300 W Xe lamp<br>$\lambda\geq 380$ nm    | J. Am. Chem. Soc. 2021, 143, 12220–12229    |
| MUV-10(Ca)/Pt                                              | 3.1           | 6.77 $\mu\text{mol}\cdot\text{h}^{-1}$  | -              | 3D        | 300 W Xe lamp<br>UV-visible              | Angew. Chem. Int. Ed. 2018, 130, 8589–8593  |
| ACM-1/Pt                                                   | 2.3           | 67 $\mu\text{mol}\cdot\text{h}^{-1}$    | 0.15<br>440 nm | 3D        | 300 W Xe lamp<br>$\lambda\geq 380$ nm    | Angew. Chem. Int. Ed. 2020, 59, 13468–13472 |
| NH <sub>2</sub> -MIL-101/Pt                                | -             | 4.8 $\mu\text{mol}\cdot\text{h}^{-1}$   | -              | 3D        | 500 W Xe/Hg lamp<br>$\lambda\geq 420$ nm | Chem. Commun. 2014, 50, 11645-11648         |
| NH <sub>2</sub> -MIL-125(Ti)/Pt                            | 2.6           | 3.67 $\mu\text{mol}\cdot\text{h}^{-1}$  | -              | 3D        | 300 W Xe lamp<br>$\lambda\geq 420$ nm    | J. Phys. Chem. C. 2012, 116, 20848–20853    |
| Al-PMOF/Pt                                                 | -             | 0.8 $\mu\text{mol}\cdot\text{h}^{-1}$   | -              | 3D        | 300 W Xe lamp<br>$\lambda\geq 420$ nm    | Angew. Chem. Int. Ed. 2012, 51, 7440–7444   |
| Pt <sub>NP</sub> /SnO <sub>2</sub> /UiO-66-NH <sub>2</sub> | 2.6           | 42.3 $\mu\text{mol}\cdot\text{h}^{-1}$  | -              | 3D        | 300 W Xe lamp<br>$\lambda\geq 420$ nm    | Adv. Mater. 2022, 34, 2109203               |
| MoO <sub>3</sub> /MIL-125-NH <sub>2</sub>                  | 2.6           | 20 $\mu\text{mol}\cdot\text{h}^{-1}$    | 0.41<br>380 nm | 3D        | 300 W Xe lamp<br>$\lambda\geq 380$ nm    | Angew. Chem. Int. Ed. 2022, 61, e202204108. |

**Table S2** The Pt content on the typical samples by ICP analysis.

| <b>Smamples</b> | <b>Pt / wt/%</b> |
|-----------------|------------------|
| Pt/Mn-TBAPy-SC  | 0.32             |
| Pt/Mn-TBAPy-NT  | 0.33             |

For the photocatalytic water reduction, the amount of photocatalysts is 20 mg, the Pt weight percentages are measured and calculated by the sample weight. The H<sub>2</sub> evolution rates of both samples were normalized according to the Pt amounts (Fig. S12).

**Table S3** Fitting parameters for the TA kinetics shown in Fig. 3a, Fig. 3b, and Fig. S16. The kinetics are fitted by a multi-exponential function.

| MOFs           | Wavelength<br>/ nm | $\tau_1$ / ps ( $a_1$ ) | $\tau_2$ / ps ( $a_2$ ) | $\tau_3$ / ns ( $a_3$ ) |
|----------------|--------------------|-------------------------|-------------------------|-------------------------|
| Mn-TBAPy-SC    | 630                | 7.9 (15.9%)             | 1940 (73.6%)            | > 10 (10.5%)            |
|                | 730                | 7.9 (12.9%)             | 1940 (87.1%)            |                         |
| Mn-TBAPy-NT    | 609                | 46.6 (14.7%)            | 1880 (34.8%)            | > 10 (50.6%)            |
|                | 690                | 6.7 (58.4%)             | 1880 (27.4%)            | > 10 (14.2%)            |
| Pt/Mn-TBAPy-SC | 630                | 9.2 (35.5%)             | 3350 (64.5%)            | /                       |
| Pt/Mn-TBAPy-NT | 609                | 321.9 (24.9%)           | 3940 (75.1%)            | /                       |

The decay processes were fitted by the following multi-exponential function:

$$TA(t) = A_1 e^{-\frac{t}{\tau_1}} + A_2 e^{-\frac{t}{\tau_2}} + A_3 e^{-\frac{t}{\tau_3}} + \dots + A_n e^{-\frac{t}{\tau_n}} \quad (2)$$

**Table S4** Fitting parameters of combined fs and ns TA kinetics as shown in Fig. 3c and Fig. 3d.

| MOFs           | $\tau_1$ / ps ( $a_1$ ) | $\tau_2$ / ns ( $a_2$ ) | $\tau_3$ / ns ( $a_3$ ) | $\tau_4$ / ms ( $a_4$ ) | $\tau_{ave}$ / ns |
|----------------|-------------------------|-------------------------|-------------------------|-------------------------|-------------------|
| Mn-TBAPy-SC    | 7.9, fixed<br>(18.7%)   | 1.9, fixed<br>(74.1%)   | 44.4<br>(7.1%)          | /                       | 4.6               |
| Pt/Mn-TBAPy-SC | 7.9, fixed<br>(33.4%)   | 1.9, fixed<br>(59.1%)   | 41.4<br>(7.5%)          | /                       | 4.2               |
| Mn-TBAPy-NT    | 46.6, fixed<br>(16.1%)  | 1.9, fixed<br>(32.0%)   | 22.8<br>(44.7%)         | 3.4<br>(7.2%)           | 255.6             |
| Pt/Mn-TBAPy-NT | /                       | 0.15<br>(13.4%)         | 2.1<br>(69.2%)          | 0.05<br>(17.4%)         | 10.6              |

The whole TA kinetics of the internal charge-separated (ICS) state of Mn-TBAPy-SC and Pt/Mn-TBAPy-SC samples can be described by the following function:

$$TA(t) = A_1 e^{-\frac{t}{\tau_1}} + A_2 e^{-\frac{t}{\tau_2}} + A_3 e^{-\frac{t}{\tau_3}} \quad (3)$$

where  $\tau_1$  represents exciton-exciton annihilation time,  $\tau_2$  and  $\tau_3$  represent the decay lifetime of excitonic state and internal charge-separated (ICS) state that different from the excitonic state, respectively. We fixed the ultrafast component of  $\tau_1$  and  $a_1$  obtained via the fitting of fs-TA kinetics (Table S3), and  $\tau_2$  and  $\tau_3$  as the free fitting parameters.

The TA kinetics of internal charge-separated (ICS) states were described by a four-exponential function because of the existence of a fast rising kinetics in Mn-TBAPy-NT and Pt/Mn-TBAPy-NT samples:

$$TA(t) = A_1 e^{-\frac{t}{\tau_1}} + A_2 e^{-\frac{t}{\tau_2}} + A_3 e^{-\frac{t}{\tau_3}} + A_4 e^{-\frac{t}{\tau_4}} \quad (4)$$

where  $\tau_1$  represents the excitonic-state-to-ICS transfer time in Mn-TBAPy-NS,  $\tau_3$  and  $\tau_4$  represent the decay lifetimes of the ICS states. When fitting the kinetics,  $\tau_1$  and  $\tau_2$  were fixed as constants according to the fitting results of fs-TA kinetics (Table S3), and  $\tau_3$ ,  $\tau_4$  were set as the free fitting parameters.

**Table S5** Fitting parameters for the PL kinetics shown in Fig. 3e. The kinetics are fitted by a multiple-exponential function.

| <b>MOFs</b>    | <b>A<sub>1</sub></b> | <b>τ<sub>1</sub> / ns</b> | <b>A<sub>2</sub></b> | <b>τ<sub>2</sub> / ns</b> | <b>Average time / ns</b> |
|----------------|----------------------|---------------------------|----------------------|---------------------------|--------------------------|
| Mn-TBAPy-NT    | 0.28                 | 0.86                      | 0.60                 | 17.88                     | 12.45                    |
| Pt/Mn-TBAPy-NT | 0.24                 | 2.73                      | 0.60                 | 0.58                      | 1.19                     |
| Mn-TBAPy-SC    | 0.42                 | 0.51                      | 0.48                 | 2.81                      | 1.69                     |
| Pt/Mn-TBAPy-SC | 0.47                 | 0.53                      | 0.47                 | 0.53                      | 0.53                     |

**Table S6** The fitting parameters of photocatalyst electrodes.

| <b>Smamples</b> | <b><math>R_s/\Omega</math></b> | <b><math>R_{ct}/\Omega</math></b> |
|-----------------|--------------------------------|-----------------------------------|
| Mn-TBAPy-SC     | 15                             | 308240                            |
| Pt/Mn-TBAPy-SC  | 12                             | 222600                            |
| Mn-TBAPy-NT     | 15                             | 61000                             |
| Pt/Mn-TBAPy-NT  | 20                             | 30010                             |

**Table S7** Hall measurement parameters of the photocatalysts.

| <b>Samples</b> | <b>Resistivity/<br/><math>\Omega \text{ cm}^{-1}</math></b> | <b>Migration rate/<br/><math>\text{cm}^2/\text{V.S}</math></b> | <b>Carrier<br/>concentration/<math>\text{cm}^{-3}</math></b> | <b>Hall coefficient/<br/><math>\text{cm}^3 \text{ C}^{-1}</math></b> |
|----------------|-------------------------------------------------------------|----------------------------------------------------------------|--------------------------------------------------------------|----------------------------------------------------------------------|
| Mn-TBAPy-SC    | 3.13E-2                                                     | 0.449                                                          | 4.45E+18                                                     | -1.41E-4                                                             |
| Mn-TBAPy-NT    | 2.15E-2                                                     | 0.489                                                          | 8.03E+18                                                     | -1.23E-4                                                             |



**Table S8** Fitting parameters of Mn K-edge EXAFS curves for different samples.

| Samples                         | Path  | CN      | R (Å)     | $\sigma^2$ ( $\times 10^{-3}$ Å <sup>2</sup> ) | $\Delta E_0$ (eV) | R (%) |
|---------------------------------|-------|---------|-----------|------------------------------------------------|-------------------|-------|
| Mn-TBAPy-SC <sup>[a]</sup>      | Mn-O  | 5.1±0.5 | 2.10±0.01 | 5.6±1.2                                        | -3.45±0.89        | 0.4   |
| Mn-TBAPy-NT <sup>[b]</sup>      | Mn-O  | 4.9±0.4 | 2.14±0.01 | 7.4±1.5                                        | -2.21±0.88        | 0.4   |
| Mn foil <sup>[c]</sup>          | Mn-Mn | 12      | 2.67±0.01 | 5.9±1.7                                        | 6.82±1.69         | 1.5   |
| MnO <sup>[d]</sup>              | Mn-O  | 6       | 2.22±0.02 | 10.7±2.7                                       | -1.79±2.25        | 1.2   |
|                                 | Mn-Mn | 12      | 3.14±0.01 | 9.5±1.2                                        | -4.65±1.30        |       |
| MnO <sub>2</sub> <sup>[e]</sup> | Mn-O  | 6       | 1.89±0.02 | 2.4±1.0                                        | -4.27±3.33        | 1.1   |

N, coordination number; R, distance between absorber and backscatter atoms;  $\sigma^2$ , Debye-Waller factor to account for both thermal and structural disorders;  $\Delta E_0$ , inner potential correction; R factor (%) indicates the goodness of the fit.  $S_0^2$  was fixed to 0.8 as determined from Mn foil fitting.

[a] Fitting range:  $2.4 \leq k$  ( $\text{Å}^{-1}$ )  $\leq 11.4$  and  $1.0 \leq R$  ( $\text{Å}$ )  $\leq 2.1$ .

[b] Fitting range:  $2.3 \leq k$  ( $\text{Å}^{-1}$ )  $\leq 10.4$  and  $1.0 \leq R$  ( $\text{Å}$ )  $\leq 2.2$ .

[c] Fitting range:  $2.5 \leq k$  ( $\text{Å}^{-1}$ )  $\leq 12.4$  and  $1.9 \leq R$  ( $\text{Å}$ )  $\leq 2.8$ .

[d] Fitting range:  $2.5 \leq k$  ( $\text{Å}^{-1}$ )  $\leq 12.8$  and  $1.0 \leq R$  ( $\text{Å}$ )  $\leq 3.1$ .

[e] Fitting range:  $2.6 \leq k$  ( $\text{Å}^{-1}$ )  $\leq 11.7$  and  $1.0 \leq R$  ( $\text{Å}$ )  $\leq 1.8$ .

## References

- 1 Y. Xiao, X. Guo, T. Yang, J. Liu, X. Liu, Y. Xiao, L. Liu, T. Liu, S. Ye, J. Jiang, F. Zhang and C. Li, *Sci. China Chem.*, 2020, **63**, 1756-1760.
- 2 Q. Wang and K. Domen, *Chem. Rev.*, 2020, **120**, 919-985.
